# Increased extracellular adenosine in *Drosophila* that are deficient in adenosine deaminase activates a release of energy stores leading to wasting and death

Monika Zuberova<sup>1</sup>, Michaela Fenckova<sup>1</sup>, Petr Simek<sup>2</sup>, Lucie Janeckova<sup>1</sup> and Tomas Dolezal<sup>1,2,\*</sup>

## SUMMARY

Extracellular adenosine is an important signaling molecule in neuromodulation, immunomodulation and hypoxia. Adenosine dysregulation can cause various pathologies, exemplified by a deficiency in adenosine deaminase in severe combined immunodeficiency. We have established a *Drosophila* model to study the effects of increased adenosine in vivo by mutating the main *Drosophila* adenosine deaminase-related growth factor (ADGF-A). Using a genetic screen, we show here that the increased extracellular adenosine in the *adgf-a* mutant is associated with hyperglycemia and impairment in energy storage. The adenosine works in this regard through the adenosine receptor as an anti-insulin hormone in parallel to adipokinetic hormone, a glucagon counterpart in flies. If not regulated properly, this action can lead to a loss of energy reserves (wasting) and death of the organism. Because adenosine signaling is associated with the immune response and the response to stress in general, our results mark extracellular adenosine as a good candidate signal involved in the wasting syndrome that accompanies various human pathologies.

## INTRODUCTION

A genetic deficiency of adenosine deaminase (ADA) is accompanied by greatly elevated levels of its substrates adenosine and deoxyadenosine. This deficiency causes severe combined immunodeficiency (SCID) in both humans and mice, as well as pathological changes in other tissues (Blackburn et al., 1998; Hershfield and Mitchell, 2001). Elevated levels of extracellular adenosine are also observed during multiple organ failure (Hasko et al., 2002), the cause of 50-80% of all deaths in surgical intensive care units.

Adenosine is an endogenous purine nucleoside that has multiple functions. It is a structural component of nucleic acids, but it also plays an important role in physiological regulation both inside and outside the cell. Inside the cell, it acts as an intermediate in the biosynthetic pathway leading to ATP. However, it can be released from cells or formed extracellularly from ATP/ADP/AMP. The extracellular form plays an important role in controlling various processes, including neuromodulation (Dunwiddie and Masino, 2001), vasoconstriction and hormone release (Nyce, 1999). The release of adenosine in some tissues has been shown to be stimulated by hypoxia (Buck, 2004). Specific inflammatory stimuli, such as bacterial products, are also capable of triggering adenosine release from immune cells (Bodin and Burnstock, 1998). Adenosine regulates cellular functions by binding to G-protein-coupled adenosine receptors (A1, A2a, A2b and A3 in mammals) that can regulate intracellular cAMP (Latini and Pedata, 2001).

The role of adenosine as a signaling molecule is in many ways indistinguishable from that of a hormone and it is sometimes called

a 'stress hormone' (Hasko et al., 2002). Compared with typical hormones, which are usually secreted from a storage pool or synthesized from a precursor in response to a specific external stimulus, adenosine formation is typically a consequence of the metabolic status within the secreting cell, as is the case for regulatory metabolites. Therefore, adenosine can be seen as a regulatory metabolite that has extended its sphere of action beyond the cell that generates it (Newby, 1985).

In animals, there are two groups of enzymes with adenosine deaminase activity, referred to as ADA1 and ADA2. Although the protein responsible for ADA1 activity, which when defective is associated with human SCID, has been known for long time (Valerio et al., 1984), the protein with ADA2 activity has only recently been isolated (Zavialov and Engstrom, 2005). ADA2 is encoded by human *CECR1* gene, which is a member of a novel family of adenosine deaminase-related growth factors (ADGFs) (Maier et al., 2005).

We have established a *Drosophila* model to study the effects of increased levels of adenosine by targeting *Drosophila* ADGFs using homologous recombination mutagenesis (Dolezal et al., 2003). Six *Drosophila* ADGF genes are homologs of human *CECR1* and thus belong to the family of ADA2 genes (Dolezelova et al., 2005). We showed that a product of the *ADGF-A* gene is a secreted, active adenosine deaminase (Zurovec et al., 2002) and that it is the major source of the ADA activity during *Drosophila* larval development (Dolezal et al., 2005).

The *adgf-a* mutation leads to dramatically increased levels of adenosine and deoxyadenosine in the larval hemolymph (insect blood) and to larval or pupal death, associated with fat body disintegration and formation of melanotic capsules in the late third-instar larvae (Dolezal et al., 2005). Melanotic capsule formation is accompanied by a massive release of hemocytes from the lymph gland. Both intracellular (by cell uptake) and extracellular (i.e. signaling) effects of the increased adenosine concentration might play roles in the *adgf-a* phenotype.

<sup>1</sup>Department of Molecular Biology, Faculty of Science, University of South Bohemia, Branisovska 31, Ceske Budejovice 37005, Czech Republic

<sup>2</sup>Institute of Entomology, Biology Centre of the Academy of Sciences of the Czech Republic, Branisovska 31, Ceske Budejovice 37005, Czech Republic

\*Author for correspondence (tomas.dolezal@pf.jcu.cz)

*Drosophila* possesses one homolog of the adenosine receptor (AdoR) (Dolezelova et al., 2007), which activates cAMP and calcium signaling similarly to mammalian A2B receptor by coupling to the G-protein subunits  $G\alpha_s$  and  $G\alpha_q$ . A rescue of the *adgf-a* mutant phenotype by the *adoR* mutation showed that a significant part of the mutant phenotype is caused by the signaling effect of the extracellular adenosine (Dolezal et al., 2005).

The increased level of extracellular adenosine in the *adgf-a* mutant could have various consequences, and the actual reason for the larval lethality of the *adgf-a* mutant had not been determined in our previous studies. Therefore, we decided to use a large genetic screen for genes suppressing the *adgf-a* mutant phenotype. The results of this screen and the work presented here demonstrate that the increased concentration of extracellular adenosine triggers an energy mobilization by increasing hemolymph glucose via adenosine receptor signaling, and that a deregulation of this process in the *adgf-a* mutant leads to its death.

## RESULTS

### Mutation in Phosphorylase Kinase suppresses the *adgf-a* mutant phenotype

To identify genes associated with the effects of elevated adenosine in vivo, we performed a genetic screen for dominant suppressors of the *adgf-a* mutant phenotype in flies (supplementary material Fig. S1). We used a Bloomington deficiency kit for chromosome X and II to screen for deletions that, when crossed to the *adgf-a* mutation, would show a significant effect on the viability of the *adgf-a* mutants. First, we simply screened vials for an increased presence of pupae homozygous for the *adgf-a* mutation. Adult flies homozygous for *adgf-a* almost never occur and there was a very low number of pupae, which usually appear a couple days after their heterozygous siblings. Thus, the presence of a higher number of homozygous pupae at the same time or shortly after the heterozygous siblings indicated suppression of the *adgf-a* mutant phenotype. This was often accompanied by further development through metamorphosis to adult flies.

We screened a total of 49 deletions for chromosome X and 73 deletions for chromosome II, and found 11 regions that suppress the *adgf-a* phenotype (supplementary material Table S1). We used microdeletions and transposable element insertions to further analyze the identified regions to find the particular genes with the suppressing effect in each region. The originally identified deficiency *Df(1)Exel9050* in the cytological localization 10D5-10D6 was molecularly defined by the transposon insertions P{XP}d00034 and PBac{RB}FucT6<sup>e02394</sup>, which were used to produce this deficiency (Parks et al., 2004) (Fig. 1A). The deficiency spanned over three genes, including the *Phosphorylase Kinase  $\gamma$*  gene (*PhK- $\gamma$* ; Fig. 1A). We tried an available P element insertion P{EP}PhKgamma[EP779] (designated EP779 hereafter), which was inserted in the second exon of an alternatively spliced variant designated the PhK- $\gamma$ -RC transcript (Fig. 1A). The results showed that the heterozygous EP779 insertion suppresses the *adgf-a* mutant phenotype and that this suppression effect is stronger when the EP779 insertion is homozygous (Fig. 1B). The effect of this insertion is more apparent at the morphological level in the rescued animals. The *adgf-a* mutant larvae show extensive fat body disintegration and, eventually, a complete degeneration associated with melanotic capsule formation (Dolezal et al., 2005) (Fig. 1C).

Homozygous EP779 insertion largely suppresses this phenotype when the double mutants EP779; *adgf-a* are fatter than the single *adgf-a* mutants, and the extensive disintegration of fat body typical for the *adgf-a* mutants is not observed in the double mutants (Fig. 1C).

Phosphorylase kinase (PhK) is an enzyme that has a key function in glycogenolysis, where it catalyzes the phosphorylation of the glycogen phosphorylase, which in turn catalyzes the conversion of glycogen to glucose-1-phosphate. It has four subunits, and the  $\gamma$ -subunit is responsible for the catalytic activity. A loss of the zygotic expression of *Drosophila PhK- $\gamma$*  does not affect normal embryonic and larval development; some pupal lethality is observed but the majority of mutant animals eclose to adults (Bahri and Chia, 1994).

### The *adgf-a* mutant is extremely sensitive to diet restriction

On the basis of the suppression effect of the EP779 insertion on the *adgf-a* mutant phenotype, we concluded that carbohydrate metabolism might be affected in the *adgf-a* mutant larvae and pursued further investigation in this direction. Buch and colleagues (Buch et al., 2008) showed that the glycogen stores were significantly reduced when adult flies were kept on a pure yeast diet rather than on a cornmeal-based fly food. Therefore, we tried to rear the *adgf-a* mutant larvae on yeast (a protein-rich diet) supplemented with different amounts of carbohydrates. We found a striking sensitivity of the *adgf-a* mutants to the sugar content in the diet. When larvae were grown on a yeast diet supplemented with 5% sucrose they expressed the typical *adgf-a* mutant phenotype (Fig. 2A). However, when the mutant larvae were grown on a pure yeast diet without any additional sugar supplement, they all died during the larval stages whereas the heterozygous or wild-type larvae grew normally on this diet (Fig. 2A and data not shown).

By contrast, an increase of sucrose content to 10% led to a significant increase in the mutant pupation and especially in the eclosion of adult flies compared with those on a diet containing 5% sucrose (Fig. 2A). The late third-instar larvae were indistinguishable from the wild type on the 10%-sucrose diet; similarly to larvae rescued by the mutation in *PhK- $\gamma$*  (Fig. 1C), they did not show any signs of fat body disintegration (image not shown).

In agreement with the suppression screen, the EP779 insertion in *PhK- $\gamma$* , both heterozygous and homozygous, also suppressed the *adgf-a* mutant phenotype on the 5%-sucrose diet (Fig. 2D). The suppression effect was very weak on a pure yeast diet and only when homozygous insertion was used (Fig. 2D).

The number of circulating hemocytes is greatly increased in the *adgf-a* mutant and this is associated with a melanotic capsule formation (Dolezal et al., 2005). The sugar-enriched diet decreased the number of circulating hemocytes to a normal level (Fig. 2B) and the mutants very rarely formed melanotic capsules (data not shown). It seems then that the fat body of the *adgf-a* mutant larvae reared in more restrictive conditions degenerates due to the excessive release of stores, and that the described behavior of hemocytes is a secondary reaction to this degeneration. When the fat body does not degenerate, i.e. on a diet containing 10% sucrose, the hemocytes do not express such behavior.

### Sensitivity to dietary restriction is specific for *adgf-a*

There are five additional *ADGF* genes with proven or putative adenosine deaminase activity in *Drosophila* (Zurovec et al., 2002).

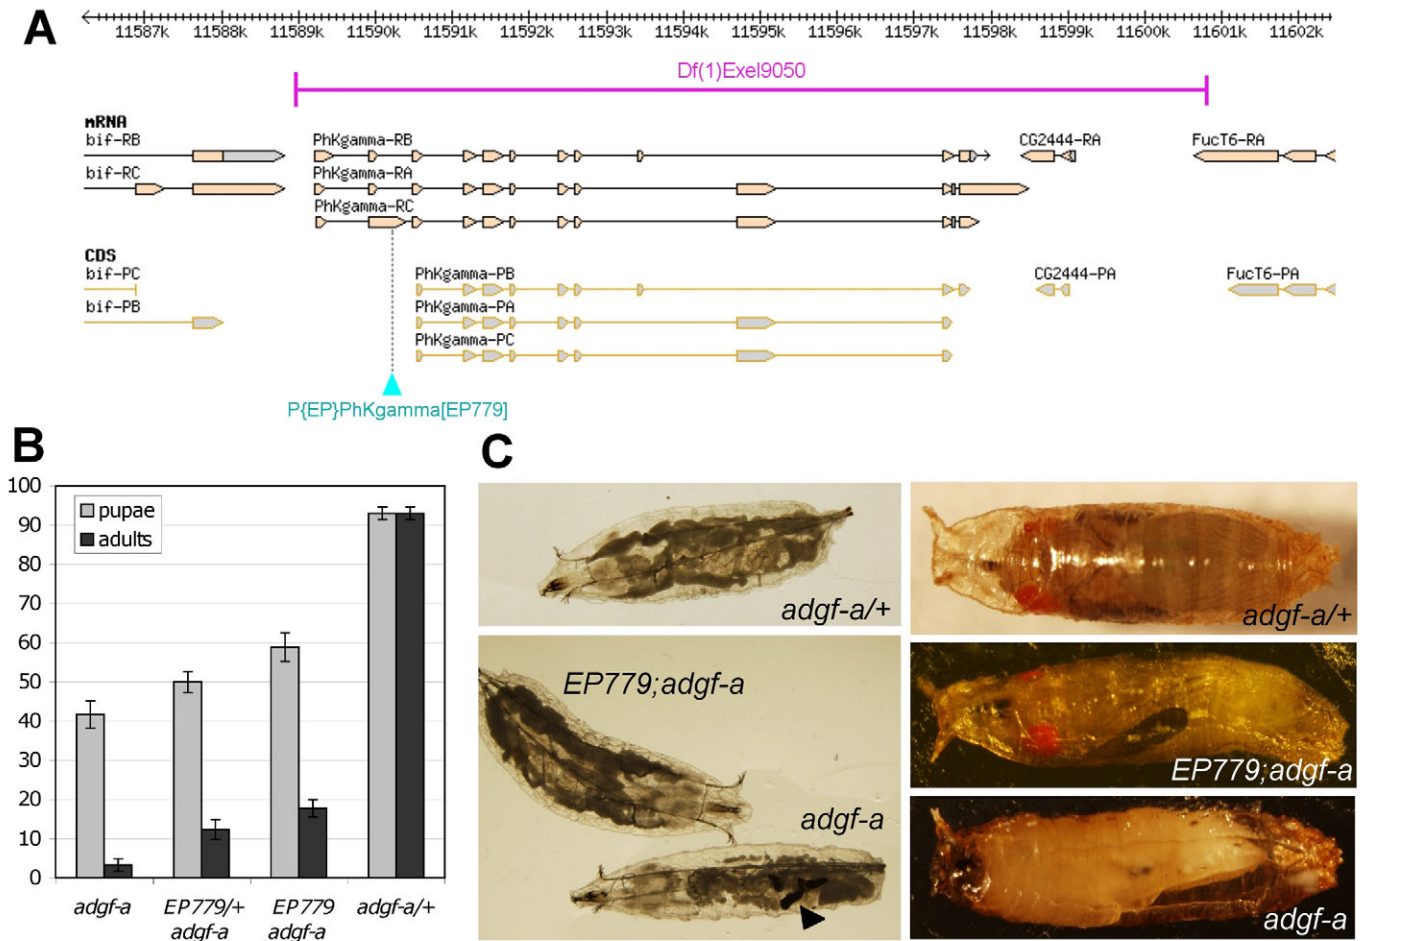

**Fig. 1. Identification of mutation in the Phosphorylase Kinase and its suppressing effect on the *adgf-a* mutant phenotype.** (A) Scheme of the genomic region covering the deficiency *Df(1)Exel9050* identified in the genetic screen. Genome scale with the sequence coordinates is shown on top. The identified deletion *Df(1)Exel9050* shown in magenta was recovered from a FLP recombination between *P{XP}d00034* (coordinate X:11589014 in the genome release 5.23) and *PBac{RB}FucT6<sup>e02394</sup>* (X:11600657) and covers three genes: *PhK-γ*, *CG2444* and *FucT6*. Structures of their various transcripts (mRNA) as well as protein coding sequences (CDS) are shown in orange and grey boxes, respectively. The rescue insertion *P{XP}PhK-gamma<sup>EP779</sup>* (*EP779*) shown in turquoise disrupts one of the three predicted transcripts of the *PhK-γ*. Corresponding cDNA clones exist for all three variants, verifying that they are all transcribed. (B) Viability of the *adgf-a* and *phk-γ* mutants on cornmeal diet. Number of pupae (light grey) and adult flies (dark grey) shows that the viability of the *adgf-a* mutant is increased by heterozygous (pupae  $P=0.006$ , adults  $P=0.011$ ) and more by homozygous insertion of *EP779* (pupae  $P=0.005$ , adults  $P=0.0003$ ). The *adgf-a* heterozygotes are used as a control (data are represented as mean percentage  $\pm$  s.e.m.). (C) Morphology of larvae (left) and pupae (right) of depicted genotypes. Pictures taken with a transilluminant light reveal the fat body tissue within the larvae (darkest tissue filling the whole larva). *adgf-a* mutants rescued by *EP779* are indistinguishable from wild-type larvae whereas the *adgf-a* mutants are almost transparent due to the absent fat body tissue (some little clumps are still present; black melanotic capsule marked by arrowhead is also visible). Right panel demonstrates the aberrant metamorphosis of the *adgf-a* mutant pupae (bottom) compared with control (top); the morphology of late pupae is, apart from a slightly bent abdomen, normal in most cases of *adgf-a* rescued by *EP779* (middle) and often the adult flies emerge from such pupae (see B).

Therefore, we decided to test whether the other members of the *ADGF* family also play a role similar to *adgf-a* in larval sensitivity to dietary restriction. We used the available combinations of mutants produced by homologous recombination: *adgf-c+adgf-d* and *adgf-a2+adgf-b* (Dolezal et al., 2003). Neither of the two combinations showed sensitivity to the dietary restriction (Fig. 2C), demonstrating that none of the four genes (*ADGF-A2*, *ADGF-B*, *ADGF-C* and *ADGF-D*) played an important role in the observed effects, at least not during larval stages. It is important to stress here that besides *ADGF-A*, only the *ADGF-D* gene is expressed

during larval development, particularly in the late third-instar larvae, under normal conditions (Zurovec et al., 2002).

We used duplications in the *ADGF-A2*, *ADGF-A*, *ADGF-B* cluster as the *adgf-a* mutant, particularly lines *adgf-a<sup>Karel</sup>* and *adgf-a<sup>Geda</sup>* (Dolezal et al., 2003) (see Methods) in which only the *ADGF-A* gene is mutated on both sides of the duplication. Therefore, we wanted to verify that the observed sensitivity to dietary restriction was solely due to the *adgf-a* mutation. So, we tested a combination of *adgf-a<sup>Am2</sup>* over *adgf-a<sup>Fr3</sup>*, which were the true single mutants for the *ADGF-A* gene recovered by a reduction of the duplications

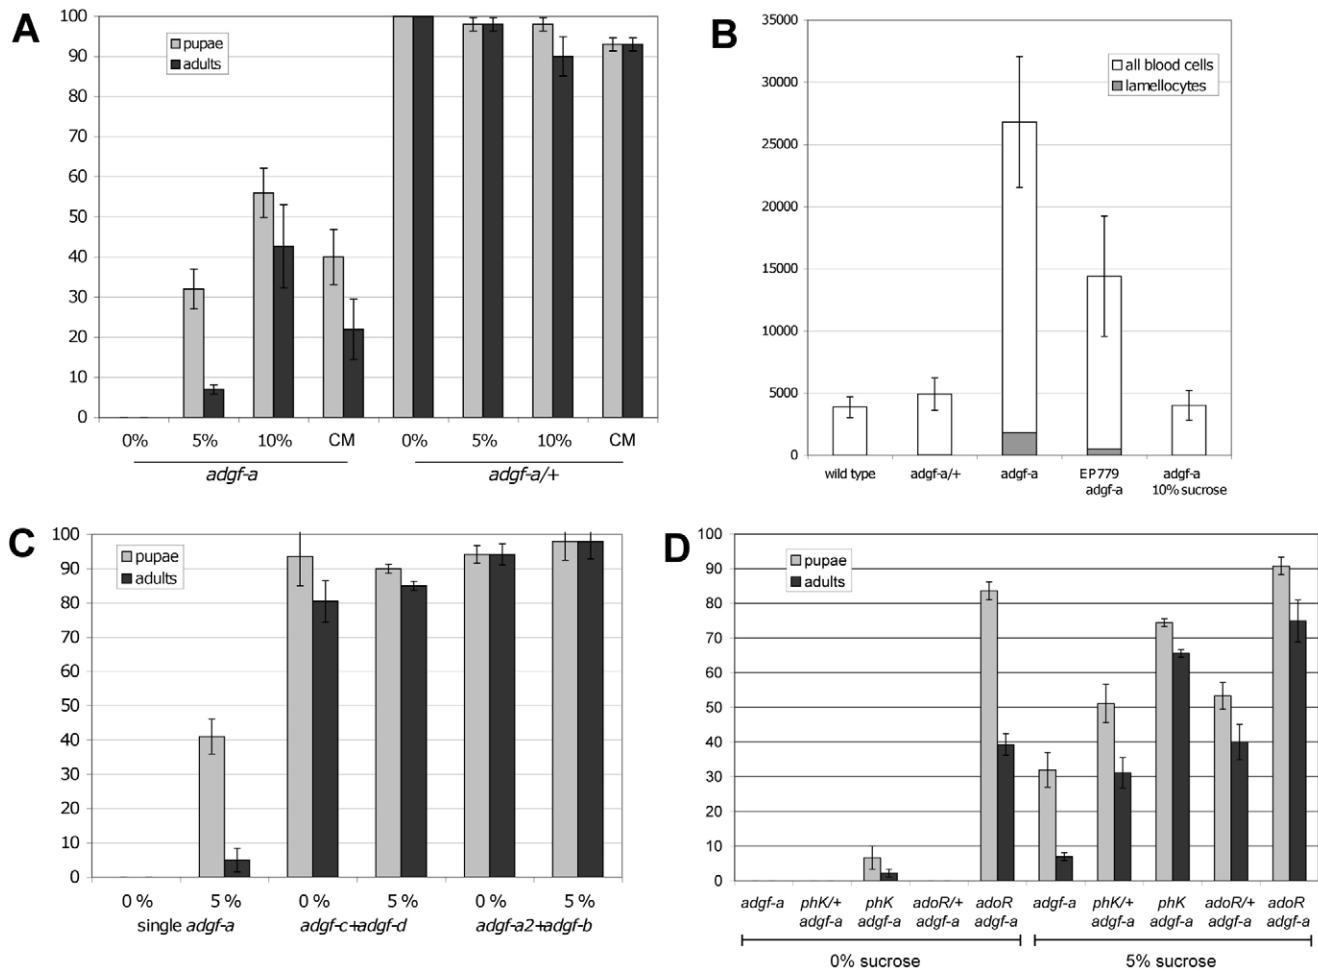

**Fig. 2. Dietary restriction experiments.** (A) Viability of the *adgf-a* mutant is dependent on the diet. Pure yeast diet (0%), yeast diet supplemented with 5% sucrose (5%) and 10% sucrose (10%), and cornmeal-based fly food (CM) were used. Survival of the *adgf-a* mutant significantly increases with increasing sucrose content in the yeast diet [pupae:  $F(2, 8)=49.45$ , 5% vs 0%  $P=0.0008$ , 10% vs 0%  $P=0.00003$ , 10% vs 5%  $P=0.0075$ ; adults:  $F(2, 8)=20.8$ , 5% vs 0%  $P=0.54$ , 10% vs 0%  $P=0.0007$ , 10% vs 5%  $P=0.0023$ ]. Survival on the cornmeal food is somewhere between that on 5% and 10% sucrose. Survival of the *adgf-a* heterozygous control is independent of the diet used. (B) Total number of circulating hemocytes per larva. Wild-type (Oregon-R) and heterozygous *adgf-a* control larvae present less than 5000 hemocytes with no lamellocytes. The fivefold increase in the *adgf-a* mutant reared on cornmeal is partially suppressed by EP779 and completely suppressed by rearing larvae on a yeast diet supplemented with 10% sucrose (data are represented as mean  $\pm$  s.e.m.). Grey part represents the fraction of lamellocytes in the total number of circulating hemocytes. (C) Viability of other ADGF mutants on yeast diet supplemented with 0% and 5% sucrose. Single *adgf-a* mutant originating from the reduction event (see Methods) shows similar viability to the *adgf-a* mutant used in the rest of the study on both diets. Double *adgf-a2 adgf-b* and *adgf-c adgf-d* mutants do not show any sensitivity to this type of dietary restriction. (D) Effect of the *adoR* and the EP779 mutation in *Phk-γ* (*phK*) on sensitivity of the *adgf-a* mutant to dietary restriction. The *adoR* mutation greatly enhances the survival on both pure yeast diet (0% sucrose) and yeast supplemented with 5% sucrose ( $P=6 \times 10^{-5}$ ), whereas the effect of *Phk-γ* is stronger only on 5% sucrose (0%  $P=0.06$ ; 5%  $P=1 \times 10^{-5}$ ). The effect is noticeable even when just one copy of *AdoR* or *Phk-γ* is mutated on the less restrictive 5%-sucrose diet (*Phk-γ*  $P=0.005$ ; *adoR*  $P=0.008$ ). Data on A,C,D are represented as mean percentage  $\pm$  s.e.m.

(Dolezal et al., 2003) (depicted as ‘single *adgf-a*’ in Fig. 2C). This combination fully phenocopied the *adgf-a*<sup>Karel</sup>/*adgf-a*<sup>Gerda</sup> mutant (described as *adgf-a* in the rest of the text; compare Fig. 2A and 2C), demonstrating that the observed effects were solely due to the mutation in the *ADGF-A* gene.

#### Sensitivity to dietary restriction is suppressed by blocking the signaling through the adenosine receptor

We took advantage of the lethal effects of dietary restriction on the *adgf-a* larvae to test the role of the extracellular adenosine signaling in these effects. We had previously shown that a mutation

in the single *Drosophila* adenosine receptor (*AdoR*) suppressed the deleterious effect of elevated levels of adenosine in the *adgf-a* mutant (Dolezal et al., 2005). As expected, the *adoR* mutation suppressed the lethality of the *adgf-a* mutant on the yeast diet supplemented with 5% sucrose, which was similar to cornmeal fly food (Fig. 2D). The same mutation also greatly suppressed the enhanced lethality of *adgf-a* on the pure yeast diet. Fig. 2D shows that almost all the *adoR adgf-a* double mutants pupate compared with no pupation of either single *adgf-a* mutant or mutants homozygous for *adgf-a* and heterozygous for *adoR*. A significant number of the double mutants also emerged as adults.

### Measurements of the extracellular adenosine and carbohydrates in the hemolymph

The rescue by the mutation in *PhK-γ* and the sensitivity to dietary restriction indicated that energetic metabolism was affected in the *adgf-a* mutant. Therefore, we measured the levels of circulating carbohydrates in the hemolymph of the control and mutant larvae as one of the markers of energetic metabolism. We collected hemolymph of the pre-wandering third-instar larvae of selected genotypes reared on different diets, eliminated the cells (mainly circulating hemocytes) by centrifugation, and measured the levels of hemolymph glucose and trehalose in parallel with adenosine levels in the same sample using mass spectroscopy analysis.

Similar to our previous observation (Dolezal et al., 2005), although the extracellular adenosine concentration never exceeded 0.2 μM in the hemolymph of the wild-type or heterozygous *adgf-a* larvae, it increased to 2.5 μM in the *adgf-a* mutants (Fig. 3A, top). The glucose level in the hemolymph was doubled in the *adgf-a* mutants compared with wild-type larvae (Fig. 3A, middle). The increased survival of the *adgf-a* mutant reared on 10% sucrose was not associated with a decrease of extracellular adenosine because its level increased similarly with both the 5%- and 10%-sucrose diets (Fig. 3A, top). The level of glucose was also similarly increased in the *adgf-a* mutant reared on diets containing either 5% or 10% sucrose (Fig. 3A, middle).

The significant increase of circulating glucose in the *adgf-a* mutants is in agreement with the results above, suggesting an affected energetic metabolism. The blocking of adenosine signaling by the *adoR* mutation decreases the level of circulating glucose in the *adgf-a* mutant to a normal level (Fig. 3B, middle), which is in agreement with the suppression of the sensitivity to the dietary restriction. Although the level of extracellular adenosine decreases in the *adoR adgf-a* double mutant compared with *adgf-a*, its level is still a magnitude higher than that of the wild type or heterozygous *adgf-a* control (Fig. 3B, top) showing that it is the blockage of AdoR signaling that is responsible for the observed rescue effects. Interestingly, the extracellular adenosine is similarly increased in the *EP779; adgf-a* double mutant and in *adoR adgf-a* (Fig. 3B, top) but, compared with *adoR*, the mutation in *PhK-γ* does not lower the glucose level in the hemolymph of the *adgf-a* mutant (Fig. 3B, middle).

We also measured trehalose, a non-reducing sugar formed from two glucose units, which is present both in circulation and tissues and serves as energy storage (glucose can be rapidly produced by trehalase) and protectant molecule in various stresses in prokaryotes, yeasts, plants and invertebrates (Elbein et al., 2003). The trehalose level in the hemolymph did not change in the *adgf-a* mutant compared with heterozygous siblings both on 5%- and 10%-sucrose diets (Fig. 3A, bottom) nor in the *adoR adgf-a* double mutant (Fig. 3B, bottom); there was a small increase in trehalose concentration in the *EP779; adgf-a* double mutant. Our measurement using mass spectroscopy showed levels of trehalose that were a magnitude higher than those of glucose, which is typical for most insects and other invertebrates and is associated with the role of trehalose (Wyatt and Kalf, 1957; Elbein et al., 2003; Chung, 2008). Data on *Drosophila* differ in different reports, sometimes showing same levels of glucose and trehalose (e.g. Lee and Park, 2004; Buch et al., 2008).

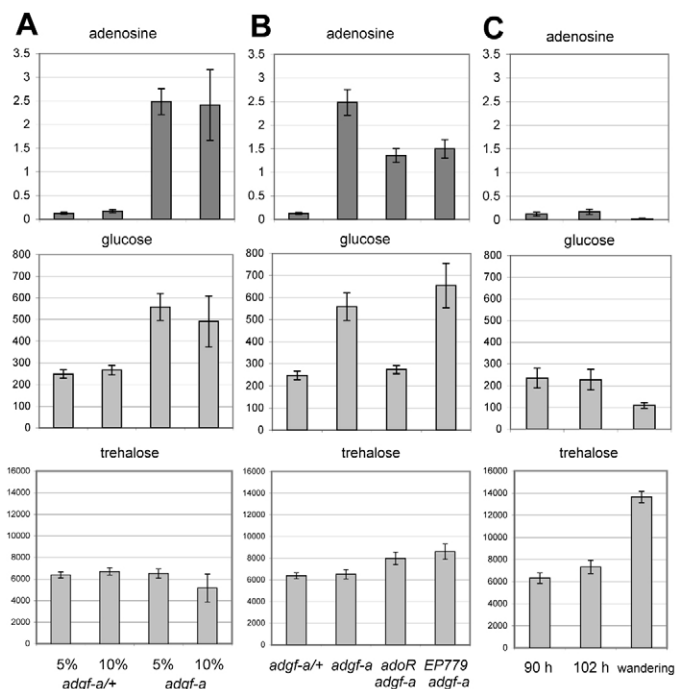

**Fig. 3. Hemolymph metabolites measurement.** (A) Adenosine, glucose and trehalose levels in the *adgf-a* mutant and heterozygous *adgf-a* control reared on yeast diets supplemented with either 5 or 10% sucrose. Adenosine is a magnitude higher and glucose is doubled in the *adgf-a* mutant on both types of diet [F(3, 26)=7.85, *adgf-a/+* vs *adgf-a* on 5%  $P=0.0019$ , *adgf-a* on 5% vs 10%  $P=0.87$ ], whereas trehalose does not change [F(3, 26)=1.098, all  $P>0.38$ ]. (B) Adenosine, glucose and trehalose in different mutant combinations reared on the 5%-sucrose diet. Adenosine levels are a magnitude higher in all three mutant combinations compared with the heterozygous *adgf-a* control. Glucose levels are doubled in the *adgf-a* single and the *EP779; adgf-a* double mutants compared with the heterozygous *adgf-a* control (*adgf-a* vs *EP779; adgf-a*  $P=0.54$ ). The *adoR* mutation in the *adoR adgf-a* double mutant lowers glucose back to normal levels (*adgf-a* vs *adoR adgf-a*  $P=0.0009$ , *adgf-a/+* vs *adoR adgf-a*  $P=0.97$ ). The trehalose level does not change or slightly increases (*adgf-a* vs *adoR adgf-a*  $P=0.148$ , *adgf-a* vs *EP779; adgf-a*  $P=0.043$ ). (C) Developmental profile of the hemolymph metabolites in the third-instar larvae heterozygous for the *adgf-a* mutation. Three time-points are shown: 90- and 102-hour-old larvae (still feeding) and non-feeding wandering larvae in which the glucose level decreases and trehalose increases. The y-axis represents concentration of adenosine (top panels), glucose (middle panels) and trehalose (bottom panels) in nmol/ml (μM); data are represented as mean values ± s.e.m. The x-axis labeling is the same for all graphs in each panel.

### Measurement of carbohydrate stores in larvae

We collected the *adgf-a* mutant larvae and their heterozygous siblings reared on cornmeal diet at different times to produce a developmental profile of carbohydrate stores, i.e. glycogen and trehalose. Fig. 4A shows that normal larvae progressively accumulated glycogen stores while feeding, reaching a peak before they start wandering. Then after the larvae stop feeding, which was associated with a decrease in hemolymph glucose (Fig. 3C, middle), the glycogen stores started a rapid decline. At least part of the glycogen utilization probably goes into the production of trehalose, the concentration of which increased in the hemolymph during wandering (Fig. 3C, bottom).

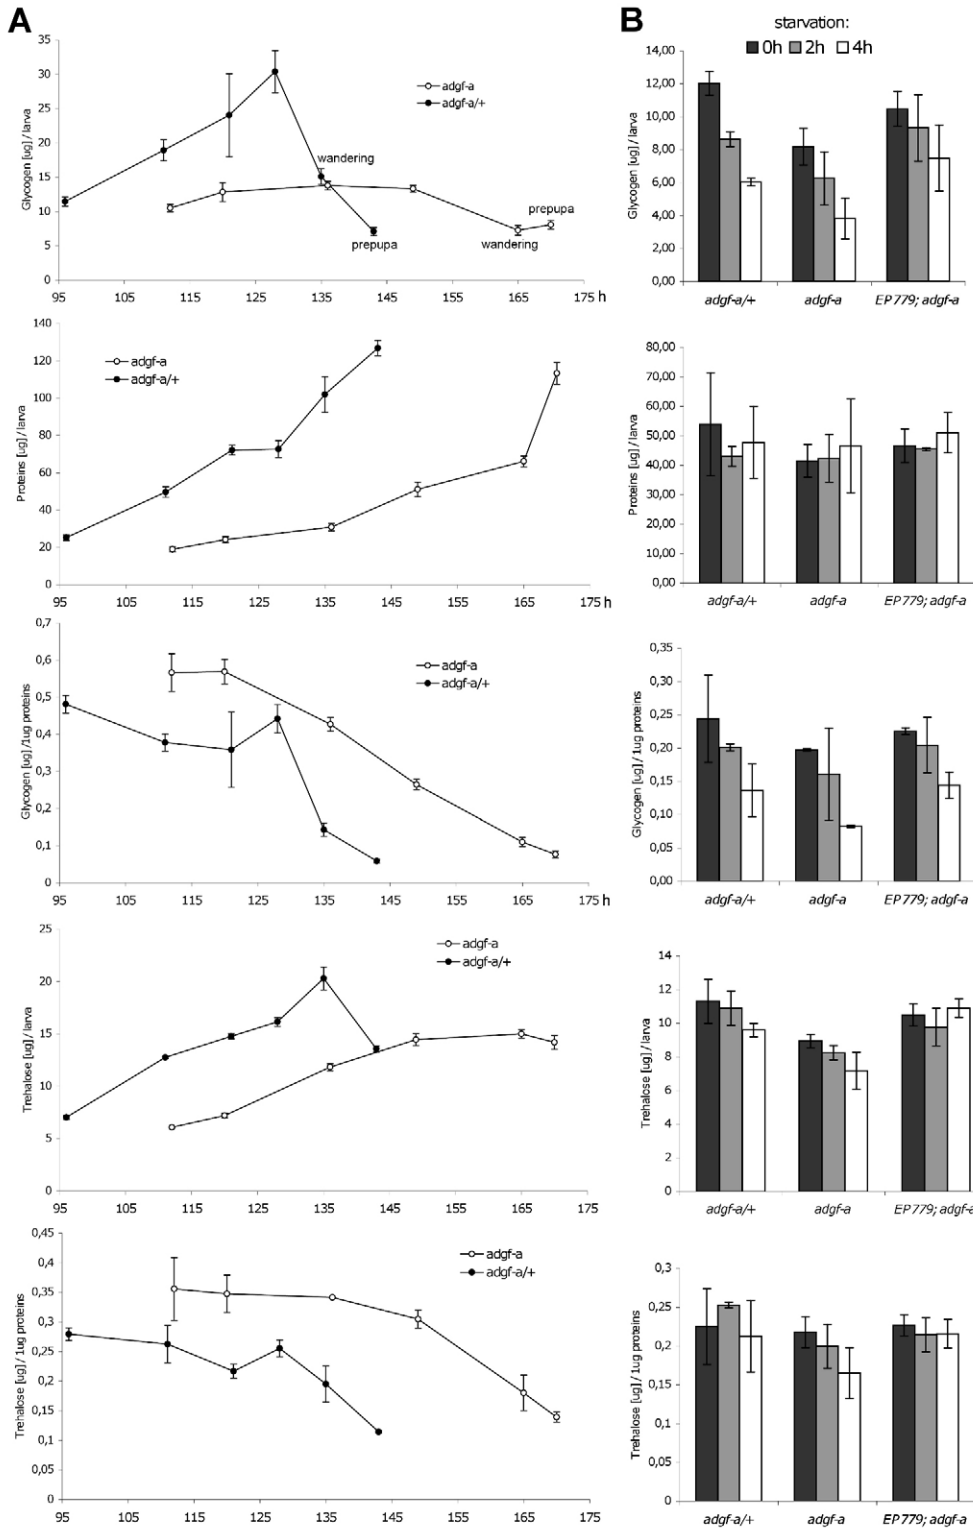

**Fig. 4. Developmental profile of carbohydrate stores, and starvation experiments.** (A) Glycogen, trehalose and protein levels at different time points (x-axis shows hours after laying eggs) during the third-instar larval development were measured in the *adgf-a* mutant (white dots) and heterozygous siblings (black dots) reared on a cornmeal diet. (B) Glycogen, trehalose and proteins were measured in 108-hour-old larvae immediately (dark grey) and after starvation for 2 hours (light grey) or 4 hours (white) in the *adgf-a* mutant, heterozygous siblings and *EP779; adgf-a* double mutant. The *EP779; adgf-a* double mutant shows significantly slower glycogen breakdown than normal larvae (multiple comparison among regressions:  $P < 0.05$ ,  $t = 1.89$ ,  $Df = 3$ ) whereas the *adgf-a* mutant does not differ. The *EP779; adgf-a* double mutant shows also a significantly different speed of trehalose use (compared with *adgf-a*  $t = 2.137$ , compared with *adgf-a/+*  $t = 1.783$  at  $P < 0.05$ ,  $Df = 3$ ). Data are represented as mean values  $\pm$  s.e.m.

Fig. 4A demonstrates that the *adgf-a* mutant larvae accumulated glycogen stores more slowly than heterozygous siblings and that they were not able to reach the pre-wandering peak present in the heterozygous siblings. There was a similar amount of glycogen stores in the prepupal stage of those *adgf-a* mutants reaching this

stage as in heterozygous siblings. Similarly to glycogen, the total trehalose also accumulated slower in the *adgf-a* mutant than in normal larvae but eventually similar levels were reached.

We also tested an effect of fasting on the carbohydrate stores. Fig. 4B shows that the speed of the glycogen breakdown was similar

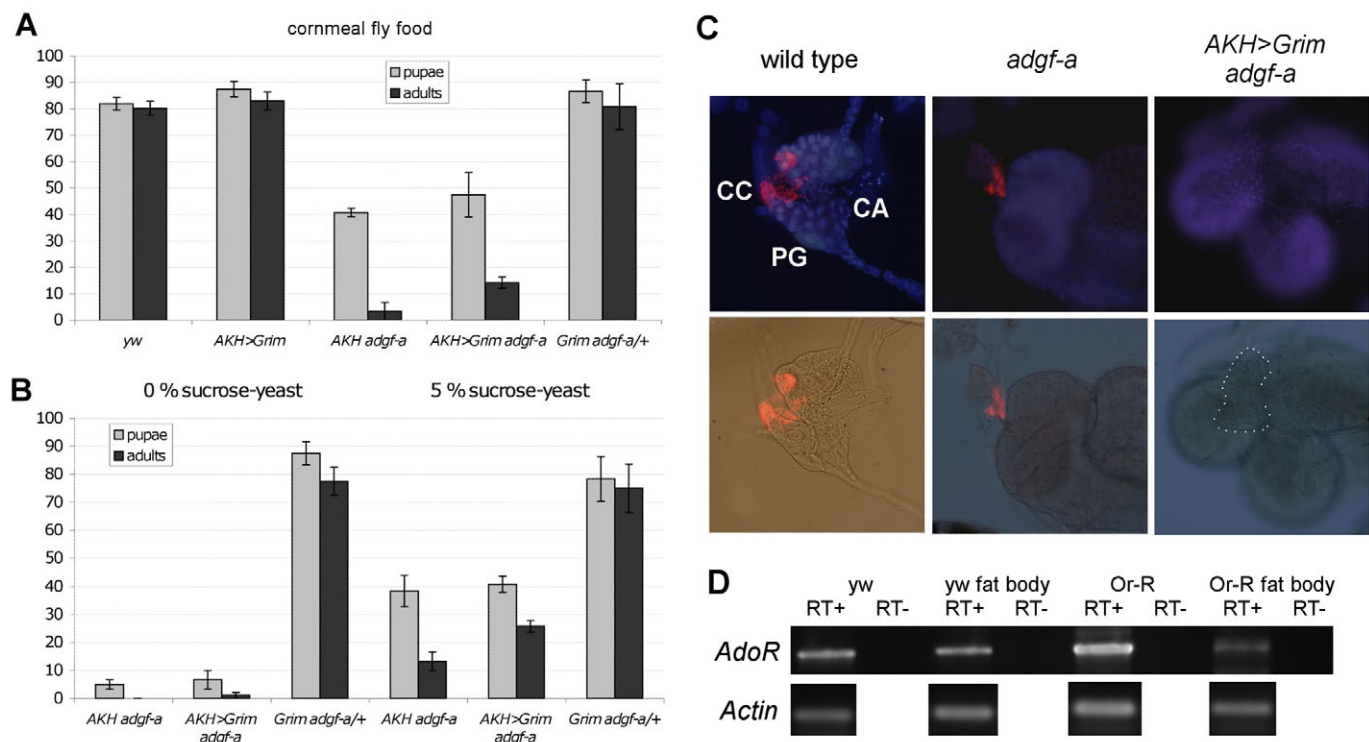

**Fig. 5. Ablation of AKH-producing cells and analysis of AdoR expression.** (A,B) Effect of an AKH-producing cell ablation on the viability of the *adgf-a* mutant. The ablation by activation of proapoptotic gene *Grim* driven by AKH-Gal4 does not affect development of otherwise wild-type larvae when compared with either *yw* or heterozygous *adgf-a* controls on cornmeal fly food (A). AKH-Gal4 alone in the *adgf-a* mutant resembles the *adgf-a* mutant phenotype and activation of *Grim* by this AKH-Gal4 shows no effect on *adgf-a* larval survival ( $P=0.23$ ) and a slight effect on the number of adult flies ( $P=0.028$ ) (A). Similar results are achieved using a pure yeast diet (pupae  $P=0.36$ , adults  $P=0.25$ ) and yeast diet supplemented with 5% sucrose (pupae  $P=0.35$ , adults  $P=0.01$ ) (B). Data are represented as mean percentage  $\pm$  s.e.m. (C) Immunohistochemical analysis of AKH-producing cells. AKH is produced and kept ready for secretion in a cluster of ring-gland cells called the corpora cardiaca (CC) both in wild-type and *adgf-a* mutant larvae, as demonstrated by staining with anti-AKH antibody (red). These cells are completely ablated by the activation of proapoptotic gene *Grim* by AKH-Gal4, demonstrated by missing signal in the ring gland (depicted by white dots) of the *adgf-a* mutant. Nuclear staining by DAPI (top panels) as well as DIC (bottom panels) is shown for morphological visualization. Dissected wild-type ring gland is shown in higher magnification (CA corpora allata; PG prothoracic gland); *adgf-a* ring gland is shown attached to the brain. (D) Gel image showing RT-PCR of *AdoR*. RNA was extracted from fat bodies of *yellow white* (*yw*) and *Oregon-R* (Or-R) larvae. Both fat bodies (*yw* fat body and Or-R fat body) and the remaining tissue after the fat body dissection (*yw* and Or-R) were analyzed. Control without reverse transcriptase (RT-) is also shown to demonstrate that the PCR product originates from reversely transcribed RNA and not from a genomic DNA contamination. Actin serves as a control for the template amount.

in the *adgf-a* and normal larvae, i.e. after 4 hours half of the stores were utilized. Interestingly, the *EP779* mutation in *Phk- $\gamma$*  slowed down the glycogen breakdown in the *adgf-a* mutant (Fig. 4B). Thus, the slower glycogen breakdown achieved by the *EP779* insertion might help the *adgf-a* larvae to accumulate more glycogen stores, which is in agreement with the rescue effect found in the genetic screen. Although there were not such dramatic changes in trehalose levels during starvation (larvae seem to preferentially use glycogen stores), *EP779* insertion also resulted in a different speed from normal and *adgf-a* larvae.

#### Extracellular adenosine stimulates energy release from the fat body in parallel to AKH

Because an adipokinetic hormone (AKH) stimulates the release of energy stores in *Drosophila* (Lee and Park, 2004), we decided to test whether the glucose release observed in the *adgf-a* mutant was due to the action of AKH. Using the UAS/Gal4 system (Brand and Perrimon, 1993), the AKH producing cells in corpora cardiaca were ablated by expressing the pro-apoptotic gene *Grim* (UAS-Grim)

(Zhou et al., 1997) driven by the AKH-Gal4 driver (Isabel et al., 2005) which is expressed exclusively in the AKH-producing cells in the corpora cardiaca (Fig. 5C). The complete ablation of these cells in otherwise wild-type larvae was vital (Isabel et al., 2005) (Fig. 5A). However, it did not lead to the increased survival of *adgf-a* mutant larvae (there was a small increase in number of adult flies on cornmeal and 5%-sucrose diet). The ablation of AKH-producing cells in the *adgf-a* mutants (Fig. 4C) resembled the *adgf-a* phenotype for all types of diets (Fig. 4A,B), demonstrating that AKH was not significantly involved in the observed effects of adenosine on the energy metabolism of larvae.

AdoR, similarly to AKH receptors, is coupled to G proteins. Although AdoR expression was previously observed using in situ hybridization in the ring gland where AKH-producing cells are also located, it was not detected in the fat body (Dolezelova et al., 2007). However, the AdoR expression was very weak, producing faint signals. Therefore, we used the more sensitive RT-PCR method to check the expression in fat body tissue isolated from the third-instar larvae. Fig. 5D demonstrates that the AdoR was indeed expressed

in this tissue. This suggests that it is direct AdoR signaling to the fat body, working parallel to AKH signaling and using the same downstream machinery of G proteins, that is responsible for the observed effects of adenosine.

## DISCUSSION

### Extracellular adenosine increases a circulating glucose

We previously showed that a deregulation of the adenosine levels due to the deficiency of *Drosophila* ADGF-A leads to larval or pupal death associated with a degeneration of larval fat body (Dolezal et al., 2005). We used a genetic screen, which led us to the identification of a mutant in the  $\gamma$ -subunit of the phosphorylase kinase (*PhK- $\gamma$* ) suppressing the *adgf-a* mutant phenotype. PhK activates through the phosphorylation of glycogen phosphorylase (glycogenolysis) (Fig. 6). Thus, the suppressive effect of *PhK- $\gamma$*  mutation corresponds to the observation that the fat body, the main organ for glycogen storage, does not degenerate in the rescued larvae. This rescue led us to a recognition that carbohydrate metabolism might be affected in the *adgf-a* mutant larvae.

The striking sensitivity of the *adgf-a* mutant to dietary restriction strongly supports this conclusion. We used a pure yeast diet, which is rich in proteins but poor in carbohydrates (Buch et al., 2008). The use of this diet led to enhanced larval lethality of the *adgf-a* mutant, whereas the wild-type larvae developed normally on this food. Supplementing the pure yeast diet with 5% sucrose gave larvae resembling the *adgf-a* mutant phenotype on the cornmeal-based fly food. An increase of sucrose to 10% then leads to a significantly higher mutant survival rate, with a greatly improved morphology of the

mutant larvae and most of them not showing any sign of fat body degeneration. Thus, although lowering carbohydrates enhances the mutant phenotype, increasing the amount of carbohydrate in the diet most probably compensates the loss of energy reserves or allows the saving of more stores than in the restrictive conditions. Saving stores of energy is crucial for the larvae to continue in their development. The survival of the *adgf-a* mutant larvae is thus critically dependent on the amount of carbohydrate in the diet.

Finally, an analysis of carbohydrate concentrations in the hemolymph demonstrated that the balance between energy storage and release was indeed shifted in the *adgf-a* mutant towards release because the mutant larvae presented doubled levels of glucose in the hemolymph compared with the wild type. The elevated levels of extracellular adenosine in the *adgf-a* mutant are thus associated with hemolymph hyperglycemia.

Extracellular adenosine was not lowered in the mutant larvae rescued on a 10%-sucrose diet compared with mutants on a 5%-sucrose diet, demonstrating that the rescue by increased sugar is not due to lowering of the extracellular adenosine level. The level of glucose in the hemolymph was also similarly increased, most probably because the elevated adenosine increases the circulating glucose to these levels. Therefore, it is plausible that increasing the amount of carbohydrates in the diet allows the saving of more stores, while still keeping the hemolymph glucose levels high. This in turn is expressed as a thick fat body of the rescued larvae on 10% sucrose. The rescue by diets higher in sucrose further demonstrates that it is not hyperglycemia (at this level) that kills the *adgf-a* mutants.

The measurement of carbohydrate stores demonstrated that the accumulation of both glycogen and trehalose during feeding period is much slower in the *adgf-a* mutant larvae than in heterozygous siblings most probably because the elevated adenosine forces the circulating glucose levels to be kept high. This might have fatal consequences for larvae on a diet poor in carbohydrates that does not allow larvae to save enough stores to proceed normally in development, as seen with the *adgf-a* mutant on a pure yeast diet. Slowing down the glycogen breakdown (by mutation in *PhK- $\gamma$* , as seen in Fig. 4B) does not help much in this situation; *EP779* increased the survival of *adgf-a* poorly on a pure yeast diet. However, it does help larvae on a 5%-sucrose diet, which seems to provide *adgf-a* with just the minimum amount of carbohydrate, sufficient to save enough stores, at least for some larvae (about a third of them) to proceed in development. Probably any situations requiring a mobilization of the energy from the glycogen stores shifts the thin balance on 5% sucrose so it does not allow the *adgf-a* mutants to pupate. In these conditions, slowing down the glycogen breakdown helps the *adgf-a* mutants, as demonstrated by a significant increase in pupariation rate of the *EP779; adgf-a* mutants on 5% sucrose.

### Adenosine via AdoR functions as an anti-insulin hormone in parallel to AKH

The main storage organ in insects is the fat body, a counterpart of mammalian liver and adipose tissue. The deposition of stores as well as the stimulation of their release is intensively studied in many insect models, which show that the basic regulation of carbohydrate metabolism is similar to that in higher organisms (Hudson et al., 1993). As shown in Fig. 6, glycogen synthesis and breakdown is

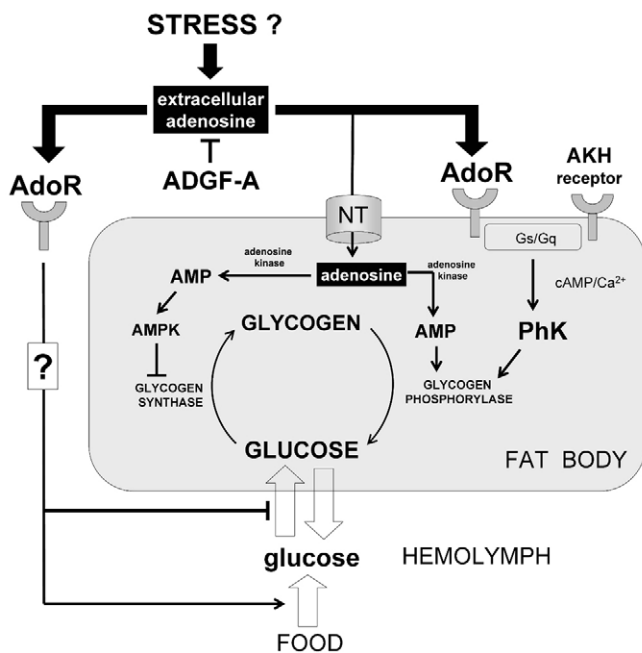

**Fig. 6. Proposed model of the action of extracellular adenosine on carbohydrate metabolism.** See text for details. ADGF-A adenosine deaminase-related growth factor A, AdoR adenosine receptor, AKH adipokinetic hormone, AMP adenosine monophosphate, AMPK AMP-activated protein kinase,  $G_s/G_q$  G protein coupled to AdoR and AKH receptor associated with production of cAMP ( $G_s$ ) or activation of phospholipase C and  $Ca^{2+}$  release ( $G_q$ ), NT nucleoside transporter, PhK phosphorylase kinase.



regulated by glycogen synthase and glycogen phosphorylase. The energy-demanding processes in insects stimulate the release of energy from the fat body stores through the action of AKHs (reviewed in Gäde and Auerswald, 2003). AKH, a counterpart of mammalian glucagon, binds to G-protein-coupled receptors and, in the case of carbohydrate metabolism, activates glycogen phosphorylase via cAMP production and  $\text{Ca}^{2+}$  (binding to  $G_s$  and  $G_q$  subunits). This includes regulation by  $\text{Ca}^{2+}$ -dependent PhK.

Extracellular adenosine can affect carbohydrate metabolism in the fat body by two possible mechanisms (Fig. 6): signaling through AdoR, and intracellularly by transport via adenosine transporters (Thorn and Jarvis, 1996) and a conversion to AMP by adenosine kinase inside the cell (Van De Wiele et al., 2002). Glycogen phosphorylase is, in addition to phosphorylation by PhK, also activated by allosteric effectors including AMP (Tsitsanou et al., 1999). AMP can also inhibit glycogen synthase through the action of AMP-activated protein kinase (AMPK) (Towler and Hardie, 2007). However, we show here that the blockage of AdoR signaling almost completely rescues the mutant larvae on a pure yeast diet. This is supported by resetting the glucose level in the hemolymph of the *adoR adgf-a* double mutants back to normal levels. These results clearly demonstrate the role of AdoR signaling in the regulation of carbohydrate metabolism in *Drosophila*. A similar role for adenosine signaling through adenosine receptors stimulating the glucose release was described for mammalian liver cells (Gonzalez-Benitez et al., 2002), suggesting that this role of extracellular adenosine and the mechanism of action are evolutionary conserved from flies to mammals.

Because AdoR is expressed in the *Drosophila* ring gland (Dolezelova et al., 2007) where the AKH-producing cells are located (Lee and Park, 2004; Isabel et al., 2005), we speculated that the effect of adenosine could be triggered by AKH release in response to AdoR signaling in the ring gland. However, the ablation of AKH-producing cells did not rescue the *adgf-a* mutant, which demonstrates that AKH is not involved in the observed effect of adenosine on carbohydrate metabolism. Previous analysis of AdoR expression by in situ hybridization did not reveal its expression in the fat body (Dolezelova et al., 2007). However, using a more sensitive method of tissue-specific RT-PCR, we show here that AdoR is indeed expressed in the fat body. Although we have not presented a definite proof, the clear suppressive effect of *adoR* mutation and AdoR expression in the fat body suggest that the direct signaling of extracellular adenosine to the fat body via AdoR might lead to the increase of glucose in the hemolymph. It was previously shown that *Drosophila* AdoR is, similarly to the AKH receptor, associated with  $G_s$  and  $G_q$  proteins, leading to formation of cAMP and  $\text{Ca}^{2+}$  release (Dolezelova et al., 2007). This leads to the conclusion that AdoR could serve as an additional receptor along with the AKH receptor for activating glycogenolysis via G-protein/PhK stimulation in the fat body (Fig. 6).

Glycogenolysis is not the only way to increase glucose in the hemolymph, especially during feeding. The mutation in *PhK- $\gamma$*  does not decrease the glucose level in the *adgf-a* mutant whereas the *adoR* mutation does. The extracellular adenosine thus instructs the organism to keep hemolymph glucose (originating most probably from dietary sucrose) levels high, while lowering glycogen storage. Therefore, there might be an additional AdoR signaling effect, besides that on glycogenolysis, that influences how much of the

carbohydrate obtained from food will be used for storage and how much will be kept in the hemolymph for immediate use (Fig. 6).

Extracellular adenosine can be then seen as a true anti-insulin hormone. This agrees with a concept proffered by the most recent work of Piña's group, that adenosine can play an even stronger anti-insulin hormone-like role in the mammalian system under certain conditions than classical anti-insulin hormones such as adrenaline or glucagon (Cortés et al., 2009). It is important to stress that although our study focuses solely on carbohydrate metabolism, adenosine might have a similar effect on lipid metabolism.

### Extracellular adenosine: a candidate signal involved in wasting

The observation that accumulated extracellular adenosine can lead to death of the organism through an impairment to the process of saving energy stores might help to better understand certain pathologies. The immune response is energetically costly (Derting and Compton, 2003; Freitak et al., 2003) and a progressive loss of energy stores – also called wasting – is observed during certain chronic infections in both flies and humans (Dionne et al., 2006; Lazzaro and Galac, 2006). In spite of a potentially high biomedical importance, the network of the molecular signals leading to wasting is largely unexplored. Results of this work suggest that extracellular adenosine could be one of those signals.

Adenosine is well known as a stress hormone and it is produced during the immune response (Hasko et al., 2002); therefore it could play an important hormonal role in energy allocation during stress conditions such as infection. Our previous work suggests a connection between adenosine signaling and Toll signaling, which is an important regulator of the immune response in flies (Dolezal et al., 2005). A requirement to use virtually sterile conditions to obtain reproducible results in this work (see Methods) suggests a high sensitivity of the *adgf-a* mutants to infectious stress. Microarray analysis in the fly model for wasting also shows changes in the expression of the adenosine-regulating enzymes (Dionne et al., 2006). It is important to further investigate this intriguing role for extracellular adenosine, and our work presented here demonstrates that *Drosophila* can be now utilized as a useful, genetically tractable model to investigate the stress-hormone-like roles of extracellular adenosine in energy allocation in different conditions in vivo.

### Concluding remarks

We have shown that (1) increased extracellular adenosine due to adenosine deaminase deficiency leads to high levels of glucose (hyperglycemia) in the hemolymph during *Drosophila* larval development. (2) This effect is carried out by adenosine signaling through the adenosine receptor. (3) Adenosine works in this regard as an anti-insulin hormone in parallel to AKH, a counterpart of mammalian glucagon. This role and mechanism seems to be well conserved between flies and mammals, making *Drosophila* a good model for these effects. (4) The hyperglycemia associated with the extensive adenosine signaling further leads to the impairment in building carbohydrate stores during the larval period and to high sensitivity to sugar restrictions in the diet. This can be partially suppressed by lowering the glycogen breakdown by a mutation in PhK. In suboptimal conditions or with diet restrictions, the described effects can lead to death of the organism. Because adenosine signaling is associated with the immune response and the response to stress in general, our results make extracellular

adenosine a good candidate for a signal involved in the wasting syndrome, which has an impact on various pathologies.

## METHODS

### Fly strains

The *adgf-a* mutant (chr. III) was prepared by crossing *w; adgf-a<sup>Karel</sup>/TM3 Ser Act-GFP* with *w; adgf-a<sup>Gerdal</sup>/TM3 Ser Act-GFP* and selection was based on the lack of GFP in *w; adgf-a<sup>Karel</sup>/adgf-a<sup>Gerdal</sup>* larvae. Both parent lines carried duplications of the *ADGF-A2*, *ADGF-A*, *ADGF-B* cluster interrupted by a *mini-white* marker in which only the *ADGF-A* gene was mutated on both sides of each duplication (Dolezal et al., 2003). Homozygotes for each duplication as well as transheterozygotes *adgf-a<sup>Karel</sup>/adgf-a<sup>Gerdal</sup>* were functionally verified to be a loss-of-function mutant just for the *adgf-a* gene (Dolezal et al., 2003). Because these two lines were produced independently and always kept separately, their combination was used as the *adgf-a* mutant to avoid the effects of any side mutations. This combination also gave us the advantage of the *mini-white* marker presence, making certain crosses easier. Additional lines that were mutant for the *ADGF-A* gene without the *mini-white* marker (*adgf-a<sup>Am2</sup>* and *adgf-a<sup>Fr3</sup>*) (Dolezal et al., 2003) were used only when specified in the text. Other strains used in this work included: *adgf-a2 adgf-b* and *adgf-c adgf-d* (double mutants on chr. III) (Dolezal et al., 2003); *adoR* (mutant in the adenosine receptor on chr. III) (Dolezal et al., 2005); *adoR adgf-a<sup>Karel</sup>* and *adoR adgf-a<sup>Gerdal</sup>* recombinant double mutants; *P{EP}PhKgamma[EP779]* (on chr. X, BDGP disruption project); UAS-Grim (insertion on chr. II, gift of John Nambu, University of Massachusetts, Amherst, MA); AKH-Gal4 (pAKH02 insertion on chr. III, gift of Jan Veenstra, CNRS, University of Bordeaux, France).

### Genetic screen for the suppressors of the *adgf-a* phenotype

A Bloomington deficiency kit for chromosome X and II (a set available in 2005, generated by the Bloomington Deletion Project, the DrosDel Project and Exelixis) was used for the screen. Deletions were crossed with the *adgf-a* mutation as shown in supplementary material Fig. S1. The *adgf-a* homozygous progeny were scored for numbers of pupae and adult flies and for the presence of melanotic capsules, in three consecutive vials.

### Feeding and developmental assays

Flies were grown on standard cornmeal medium (8% cornmeal, 5% sugar, 4% yeast, 1% agar, 0.16% methylparaben). To count viability and observe the development, flies were allowed to lay eggs for 4 hours on agar juice plates supplemented with fresh yeast paste. Embryos of ~20 hours old were collected by brush, washed in water to clean the yeast, and washed for 30 seconds in 96% ethanol to eliminate infectious agents. The ethanol-treated embryos were transferred to sterile agar plates with the desired diet to complete embryonic development. The early feeding between hatching to first-instar larvae and the transfer to vials seemed to have an important impact on the results of feeding experiments; therefore, the washed embryos were always transferred to the same diet as was in the vial. The first-instar larvae of desired genotype scored by GFP expression were collected with a sterile needle into vials (20-30 individuals per vial) supplemented with 80 µl of penicillin/streptomycin solution (Sigma; 10000 U penicillin/10 mg

streptomycin per ml). The washing of embryos and treatment with penicillin/streptomycin appeared to be crucial for obtaining consistent data because the *adgf-a* mutant seems to be very sensitive to any environmental stress. The development from larva to adults was observed and scored for each individual vial. All counting experiments were done at least in triplicates and repeated at least twice at different times.

### Yeast-based diets

For the dietary restriction experiments, the diets were prepared as follows: dry yeast and agar were dissolved in distilled water to achieve 8 and 1.2% w/v, respectively. The solution was boiled for 10-15 minutes to inactivate live yeast while maintaining the total volume. At the end, sucrose was added to make 5 or 10% w/v (for the pure yeast diet, no sucrose was added) and briefly boiled. The suspension was cooled down to ~60°C, methylparaben (Sigma) was added to 0.16% and the final diet was poured into the vials. A few hours before collecting the first-instar larvae, 80 µl of penicillin/streptomycin solution was added on the surface of each vial and allowed to dry. Agar plates for washed embryos contained the same diet with 4% agar.

During experiments we noticed that the length of cooking is important because cooking for more than 30 minutes led to a decrease in the *adgf-a* mutant survival (not the wild-type control). It seems that certain carbohydrate constituents (maybe also other important nutrients) present in the yeast and/or cornmeal become unavailable with longer cooking or boiling in a microwave oven. Therefore, we used strictly 30 minutes at 90°C using a thermomixer and all comparing experiments were done using a diet from the same cooking batch.

### Depletion of AKH-producing cells

We crossed flies carrying UAS-Grim with flies carrying AKH-Gal4 to ablate AKH-producing cells. In the rescue experiments, AKH-Gal4 was recombined with chromosome carrying *adgf-a<sup>Karel</sup>* to obtain *UAS-Grim/+; AKH-Gal4 adgf-a<sup>Karel</sup>/adgf-a<sup>Gerdal</sup>*. The presence or absence of AKH-producing cells was determined by wholemount immunostaining of the third-instar larvae using a primary rabbit anti-AKH antibody (Isabel et al., 2005), secondary anti-rabbit Cy3.5 (Rockland) and DAPI staining.

### RNA extraction and RT-PCR

Oregon-R and *yw* larvae of the late third-instar (118 hours after egg laying) were dissected in Ringer solution and the fat body separated from the rest of the larval body. Total RNA was then isolated from both fat body tissue and from the remaining carcass using Tri Reagent (MRC), following the manufacturer's instructions. Isolated RNA was treated with Turbo DNase (Ambion) and reversely transcribed into the first strand cDNA using Superscript III (Invitrogen). Control reactions (RT-) were prepared simultaneously without the addition of Superscript. The following primers were used for PCR amplification of *Actin*: Actin5CF 5'-TACCCCATGAGCACGGTAT-3' and Actin5CR 5'-GGTCATCTTCTCACGGTTGG-3'; for amplification of *AdoR*: Probe2F 5'-AGATCTCGAGCGAGAAATGTGGAAC-3' and Probe2R 5'-CTCCTGAGCCTGGCCCATG-3'. *AdoR* was amplified by 34 cycles without the additional final elongation step.

### Measurement of hemolymph metabolites

Hemolymph was collected from third-instar pre-wandering larvae. Some 10-15 larvae were teased onto a parafilm-covered microscopic slide on ice in 1  $\mu$ l of inhibition solution (1 mM thiourea, 20 mM EDTA). Then, 3  $\mu$ l of the hemolymph were transferred by automatic pipette into 60  $\mu$ l of cooled extraction medium [MeCN/water 8:2 (v/v) with 20 mM ammonium acetate, pH 7.5-8.1, spiked with the  $^{13}\text{C}$ -labeled standards: 0.5  $\mu\text{M}$   $^{13}\text{C}_5$ -adenosine and 20  $\mu\text{M}$   $^{13}\text{C}_6$ -glucose], mixed and centrifuged (1600 g for 2 minutes at 4°C). To 50  $\mu$ l of the supernatant, 50  $\mu$ l of MeCN was added and the mixture stored at -20°C until analysis using liquid chromatography coupled with tandem mass spectrometry. HPLC analysis was carried out on a quaternary Rheos Allegro UPLC system (Thermo, San Jose, CA) equipped with an HTC PAL autosampler system (CTC Analytics, Switzerland) cooled at 5°C during analysis. Separation of the analytes was performed on a Luna hydrophilic interaction liquid chromatography column (150 mm  $\times$  2.0 mm  $\times$  3  $\mu\text{m}$ ; Phenomenex, Torrance, CA) at room temperature with an injection volume of 5  $\mu$ l. Gradient elution at a flow rate of 250  $\mu$ l/minute was used, with solvent A [MeCN/water 95:5 (v/v) with 20 mM ammonium acetate, pH 8.1] and solvent B [MeCN/water 5:95 (v/v) with 20 mM ammonium acetate, pH 8.1] going from 90:10 (A/B) to 20:80 (A/B) in 10 minutes, followed by equilibration at 90:10 (A/B) for 8 minutes. The detection was carried out using a LTQ XL linear ion trap mass spectrometer (Thermo) equipped with an electrospray ion source operated simultaneously in the positive and negative ion mode, setting the sprayer voltages at 4.5 and -3.5 kV, respectively, and the ion source temperature at 350°C. Positive ions were detected after the collision-induced decomposition in the MS/MS scan mode by monitoring the transitions m/z 368.2  $\rightarrow$  136.1 and 373.2  $\rightarrow$  136.1 for adenosine and  $^{13}\text{C}_5$ -adenosine, respectively, and in the selective ion monitoring (SIM) scan mode by monitoring of the [M-H]<sup>-</sup>, [M+Cl]<sup>-</sup> and [M+CH<sub>3</sub>COO]<sup>-</sup> adduct ions of glucose,  $^{13}\text{C}_6$ -glucose and trehalose at m/z 179.1, 215.1, 239.2; m/z 185.1, 221.1, 245.1 and m/z 341.2, 377.2 and 401.3, respectively. Metabolite levels in hemolymph were calculated from the calibration data obtained by the standard addition method, by means of the previously measured hemolymph samples spiked with known concentrations of native standards against  $^{13}\text{C}_5$  adenosine (i.e. adenosine) and  $^{13}\text{C}_6$ -glucose (glucose and trehalose).

### Measurement of carbohydrate stores

Larvae of desired age were washed from the diet with cold PBS. Some 10-15 larvae were crushed in 200  $\mu$ l of PBS on ice, then immediately heated to 70°C for 7 minutes. Before heating, an aliquot for the protein measurement was taken. Samples were stored at -20°C (protein aliquots at -70°C). The thawed samples were centrifuged at 15,000 g for 7 minutes. The supernatant was transferred to a new tube. Glucose was measured with the kit GAGO-20 (Sigma) in 96-well plates. Enzyme solution (100  $\mu$ l) was added to 45  $\mu$ l of the sample and incubated for 30 minutes at 37°C. The reaction was stopped with 100  $\mu$ l of 12 N H<sub>2</sub>SO<sub>4</sub> and measured at 540 nm within 10 minutes of stopping the reaction. Glycogen and trehalose were first converted to glucose with amyloglucosidase (Fluka-Sigma 10115) or trehalase (Sigma T8778) in 30  $\mu$ l of reaction mixture per well and measured with the kit GAGO-20. For glycogen, 5  $\mu$ l of 100 U/ml solution of amyloglucosidase was added to 4  $\mu$ l of sample and filled to 30  $\mu$ l with PBS. Then, 100  $\mu$ l of

## TRANSLATIONAL IMPACT

### Clinical issue

Breakdown of excessive amounts of adenosine triphosphate (ATP), the main energy source of a cell, leads to the formation of extracellular adenosine, an important signaling molecule involved in multiple pathways that regulate neuronal and immunological function. Adenosine is either actively produced by certain cells or is released from damaged tissue, particularly when cells are starved of oxygen. Adenosine levels are tightly regulated at all points throughout its production, release, uptake and degradation, and disruptions in control that result in excessively high levels are associated with a number of human pathologies, including severe combined immunodeficiency (SCID).

The diversity in the regulation and function of adenosine (both of which differ in a tissue- and cell-specific manner) means that it has been difficult to unravel its exact role at the molecular level. In addition, data obtained in vitro, or in tissue culture, might not be relevant to whole organisms, and mammalian model systems are overly complicated. It would therefore be very useful to have a simpler model.

### Results

The authors previously showed that, in *Drosophila*, increasing extracellular adenosine by knocking out the adenosine deaminase gene (*adgf-a*) is fatal. Here, they demonstrate that larvae with increased adenosine are hyperglycemic, and cannot accumulate energy stores in the form of glycogen for their further development; in diet-restrictive conditions, these effects lead to death of the fly. Death can be prevented by mutating *AdoR*, the *Drosophila* adenosine receptor gene, which shows that the signaling function of adenosine is required for the lethal phenotype. The disruption of glucose metabolism is probably due to adenosine directly acting to stimulate glucose release in parallel with adipokinetic hormone, the *Drosophila* counterpart of glucagon.

### Implications and future directions

The identification of extracellular adenosine as a stimulator of glucose release in *Drosophila* supports a recent study in rats suggesting that stress-induced release of extracellular adenosine has a strong anti-insulin effect. The machinery of adenosine signaling seems to be well conserved between flies and mammals, making *Drosophila* a potentially useful model in which to study the effects of extracellular adenosine on energy metabolism. The link between excess adenosine and glucose metabolism might be of clinical importance because there is frequently a harmful early-phase hyperglycemia in severely traumatized patients. A second intriguing observation concerns the inability of *adgf-a* mutants to store glycogen; if this effect is conserved in mammals, it could be important in the molecularly unexplored phenomenon of wasting, which is caused by a progressive loss of energy reserves during certain infections.

doi:10.1242/dmm.006759

GAGO-20 enzyme solution were added and the reaction incubated at 37°C for 40-50 minutes. For trehalose, 3  $\mu$ l of the sample was mixed with 2  $\mu$ l PBS and 25  $\mu$ l trehalase buffer (5 mM Tris pH 6.6, 137 mM NaCl, 2.7 mM KCl and 14.8 mU/ml trehalase) (Teleman et al., 2005), incubated for 20 hours at 37°C, and then measured with GAGO-20. Proteins were measured by the Bradford assay.

For starvation experiments, larvae were collected at 108 hours after laying eggs and were starved for either 2 or 4 hours on filter paper moistened with PBS.

### Circulating hemocytes

Circulating hemocytes were counted as previously described (Dolezal et al., 2005).

### Statistical analysis

The following statistical tools were used: two-sample assuming equal variances *t*-test, ANOVA Tukey's HSD (honestly significant difference) test pro, and multiple comparison among regressions Tukey's HSD test (Zar, 1996).

### ACKNOWLEDGEMENTS

We thank the Bloomington Stock Center, John Nambu and Jan Veenstra for fly strains and antibodies. We especially thank Katerina Kucerova and Pavla Kruzberska for major technical assistance and Zdenek Fric for help with statistical analysis. This work was financially supported by the Grant Agency of the Academy of Sciences of the Czech Republic (KJB501410602), by the Grant Agency of the Czech Republic (204/09/1463 and 204/09/H058) and by the Ministry of Education, Youth and Sports of the Czech Republic (MSM6007665801).

### COMPETING INTERESTS

The authors declare no financial and competing interests.

### AUTHOR CONTRIBUTIONS

M.Z. and T.D. conceived and designed the experiments. M.Z. performed most of the experiments, M.F. performed experiments using AKH, and T.D. with help of L.J. performed the original genetic screen. M.Z., M.F., P.S. and T.D. analyzed the data. P.S. contributed mass spectrometry analysis tools. M.Z. and T.D. wrote the manuscript with M.F. providing useful comments.

### SUPPLEMENTARY MATERIAL

Supplementary material for this article is available at <http://dmm.biologists.org/lookup/suppl/doi:10.1242/dmm.005389/-/DC1>

Received 15 January 2010; Accepted 20 July 2010.

### REFERENCES

- Bahri, S. M. and Chia, W.** (1994). DPHK-gamma, a putative *Drosophila* kinase with homology to vertebrate phosphorylase kinase gamma subunits: molecular characterisation of the gene and phenotypic analysis of loss of function mutants. *Mol. Gen. Genet.* **245**, 588-597.
- Blackburn, M. R., Datta, S. K. and Kellems, R. E.** (1998). Adenosine deaminase-deficient mice generated using a two-stage genetic engineering strategy exhibit a combined immunodeficiency. *J. Biol. Chem.* **273**, 5093-5100.
- Bodin, P. and Burnstock, G.** (1998). Increased release of ATP from endothelial cells during acute inflammation. *Inflamm. Res.* **47**, 351-354.
- Brand, A. H. and Perrimon, N.** (1993). Targeted gene expression as a means of altering cell fates and generating dominant phenotypes. *Development* **118**, 401-415.
- Buch, S., Melcher, C., Bauer, M., Katzenberger, J. and Pankratz, M. J.** (2008). Opposing effects of dietary protein and sugar regulate a transcriptional target of *Drosophila* insulin-like peptide signaling. *Cell Metab.* **7**, 321-332.
- Buck, L. T.** (2004). Adenosine as a signal for ion channel arrest in anoxia-tolerant organisms. *Comp. Biochem. Physiol. B Biochem. Mol. Biol.* **139**, 401-414.
- Chung, J. S.** (2008). A trehalose 6-phosphate synthase gene of the hemocytes of the blue crab, *Callinectes sapidus*: cloning, the expression, its enzyme activity and relationship to hemolymph trehalose levels. *Saline Systems* **4**, 18.
- Cortés, D., Guinzberg, R., Villalobos-Molina, R. and Piña, E.** (2009). Evidence that endogenous inosine and adenosine-mediated hyperglycaemia during ischaemia-reperfusion through A3 adenosine receptors. *Auton. Autacoid. Pharmacol.* **29**, 157-164.
- Derting, T. L. and Compton, S.** (2003). Immune response, not immune maintenance, is energetically costly in wild white-footed mice (*Peromyscus leucopus*). *Physiol. Biochem. Zool.* **76**, 744-752.
- Dionne, M. S., Pham, L. N., Shirasu-Hiza, M. and Schneider, D. S.** (2006). Akt and FOXO dysregulation contribute to infection-induced wasting in *Drosophila*. *Curr. Biol.* **16**, 1977-1985.
- Dolezal, T., Gazi, M., Zurovec, M. and Bryant, P. J.** (2003). Genetic analysis of the ADGF multigene family by homologous recombination and gene conversion in *Drosophila*. *Genetics* **165**, 653-666.
- Dolezal, T., Dolezelova, E., Zurovec, M. and Bryant, P. J.** (2005). A role for adenosine deaminase in *Drosophila* larval development. *PLoS Biol.* **3**, e201.
- Dolezelova, E., Zurovec, M., Dolezal, T., Simek, P. and Bryant, P. J.** (2005). The emerging role of adenosine deaminases in insects. *Insect Biochem. Mol. Biol.* **35**, 381-389.
- Dolezelova, E., Nothacker, H. P., Civelli, O., Bryant, P. J. and Zurovec, M.** (2007). A *Drosophila* adenosine receptor activates cAMP and calcium signaling. *Insect Biochem. Mol. Biol.* **37**, 318-329.
- Dunwiddie, T. V. and Masino, S. A.** (2001). The role and regulation of adenosine in the central nervous system. *Annu. Rev. Neurosci.* **24**, 31-55.
- Elbein, A. D., Pan, Y. T., Pastuszak, I. and Carroll, D.** (2003). New insights on trehalose: a multifunctional molecule. *Glycobiology* **13**, 17R-27R.
- Freitag, D., Ots, I., Vanatoa, A. and Hörak, P.** (2003). Immune response is energetically costly in white cabbage butterfly pupae. *Proc. Biol. Sci.* **270**, S220-S222.
- Gäde, G. and Auerswald, L.** (2003). Mode of action of neuropeptides from the adipokinetic hormone family. *Gen. Comp. Endocrinol.* **132**, 10-20.
- González-Benítez, E., Guinzberg, R., Díaz-Cruz, A. and Piña, E.** (2002). Regulation of glycogen metabolism in hepatocytes through adenosine receptors. Role of Ca<sup>2+</sup> and cAMP. *Eur. J. Pharmacol.* **437**, 105-111.
- Hasko, G., Deitch, E. A., Szabo, C., Nemeth, Z. H. and Vizi, E. S.** (2002). Adenosine: a potential mediator of immunosuppression in multiple organ failure. *Curr. Opin. Pharmacol.* **2**, 440-444.
- Hershfield, M. S. and Mitchell, B. S.** (2001). Immunodeficiency diseases caused by adenosine deaminase deficiency and purine nucleoside phosphorylase deficiency. In *The Metabolic and Molecular Bases of Inherited Disease* (ed. B. Vogelstein), pp. 2585-2611. New York: McGraw-Hill.
- Hudson, J. W., Golding, G. B. and Crerar, M. M.** (1993). Evolution of allosteric control in glycogen phosphorylase. *J. Mol. Biol.* **234**, 700-721.
- Isabel, G., Martin, J. R., Chidami, S., Veenstra, J. A. and Rosay, P.** (2005). AKH-producing neuroendocrine cell ablation decreases trehalose and induces behavioral changes in *Drosophila*. *Am. J. Physiol. Regul. Integr. Comp. Physiol.* **288**, 531-538.
- Latini, S. and Pedata, F.** (2001). Adenosine in the central nervous system: release mechanisms and extracellular concentrations. *J. Neurochem.* **79**, 463-484.
- Lazzaro, B. P. and Galac, M. R.** (2006). Disease pathology: wasting energy fighting infection. *Curr. Biol.* **16**, R964-R965.
- Lee, G. and Park, J. H.** (2004). Hemolymph sugar homeostasis and starvation-induced hyperactivity affected by genetic manipulations of the adipokinetic hormone-encoding gene in *Drosophila melanogaster*. *Genetics* **167**, 311-323.
- Maier, S. A., Galellis, J. R. and McDermid, H. E.** (2005). Phylogenetic analysis reveals a novel protein family closely related to adenosine deaminase. *J. Mol. Evol.* **61**, 776-794.
- Newby, A. C.** (1985). The role of adenosine kinase in regulating adenosine concentration. *Biochem. J.* **226**, 343-344.
- Nyce, J. W.** (1999). Insight into adenosine receptor function using antisense and gene-knockout approaches. *Trends Pharmacol. Sci.* **20**, 79-83.
- Parks, A. L., Cook, K. R., Belvin, M., Dompe, N. A., Fawcett, R., Huppert, K., Tan, L. R., Winter, C. G., Bogart, K. P., Deal, J. E. et al.** (2004). Systematic generation of high-resolution deletion coverage of the *Drosophila melanogaster* genome. *Nat. Genet.* **36**, 288-292.
- Telemat, A. A., Chen, Y. and Cohen, S. M.** (2005). *Drosophila* Melted modulates FOXO and TOR activity. *Dev. Cell* **9**, 271-281.
- Thorn, J. A. and Jarvis, S. M.** (1996). Adenosine transporters. *Gen. Pharmacol.* **27**, 613-620.
- Towler, M. C. and Hardie, D. G.** (2007). AMP-activated protein kinase in metabolic control and insulin signaling. *Circ. Res.* **100**, 328-341.
- Tsitsanou, K. G., Oikonomakos, N. G., Zographos, S. E., Skamnaki, V. T., Gregoriou, M., Watson, K. A., Johnson, L. N. and Fleet, G. W.** (1999). Effects of commonly used cryoprotectants on glycogen phosphorylase activity and structure. *Protein Sci.* **8**, 741-749.
- Valerio, D., Duyvesteyn, M. G. C., Meera Khan, P., Pearson, P. L., Geurts van Kessel, A. and van Ormondt, H.** (1984). Direct assignment of ADA gene to chromosome 20. *Cytogenet. Cell Genet.* **37**, 599.
- Van De Wiele, C. J., Vaughn, J. G., Blackburn, M. R., Ledent, C. A., Jacobson, M., Jiang, H. and Thompson, L. F.** (2002). Adenosine kinase inhibition promotes survival of fetal adenosine deaminase-deficient thymocytes by blocking dATP accumulation. *J. Clin. Invest.* **110**, 395-402.
- Wyatt, G. R. and Kalf, G. F.** (1957). The chemistry of insect hemolymph. II. Trehalose and other carbohydrates. *J. Gen. Physiol.* **40**, 833-847.
- Zar, J. H.** (1996). *Biostatistical Analysis*, 3rd edn. London: Prentice Hall.
- Zavialov, A. V. and Engström, A.** (2005). Human ADA2 belongs to a new family of growth factors with adenosine deaminase activity. *Biochem. J.* **391**, 51-57.
- Zhou, L., Schnitzler, A., Agapite, J., Schwartz, L. M., Steller, H. and Nambu, J. R.** (1997). Cooperative functions of the reaper and head involution defective genes in the programmed cell death of *Drosophila* central nervous system midline cells. *Proc. Natl. Acad. Sci. USA* **94**, 5131-5136.
- Zurovec, M., Dolezal, T., Gazi, M., Pavlova, E. and Bryant, P. J.** (2002). Adenosine deaminase-related growth factors stimulate cell proliferation in *Drosophila* by depleting extracellular adenosine. *Proc. Natl. Acad. Sci. USA* **99**, 4403-4408.
